# Supplementary material for: M1 macrophage-derived exosomal miRNA-155-5p induced disease inflammatory microglia by targeting SOCS1/JAK1/STAT1 signal pathway in APP/PS1 transgenic mice
Source: Research Square preprint supplement (doi:10.21203/rs.3.rs-4804534/v1), 2024-08-23
Supplement: Supplementary file 1 [file 2ecda146eba0f421ae56a611.docx]

**Table S2.** DIM-conserved genes

| jun | junb | Nfkbia | Il1a | Tnf | Cd83 |
| --- | --- | --- | --- | --- | --- |
| Atf3 | Btg2 | Ccl4 | Ctss | Dusp1 | Egr1 |
| Icam1 | Ier2 | Ier5 | Il1a | Klf6 | Zfp36 |
| Fosb | Cd14 | Fth1 | Nfkbiz | Cd86 | Fcgr2b |
| fos | Cxcl10 | Il1b | Ccl12 | Hspa1b | Hspa1a |
