# Supplementary material for: M1 macrophage-derived exosomal miRNA-155-5p induced disease inflammatory microglia by targeting SOCS1/JAK1/STAT1 signal pathway in APP/PS1 transgenic mice
Source: Research Square preprint supplement (doi:10.21203/rs.3.rs-4804534/v1), 2024-08-23
Supplement: Supplementary file 2 [file 933f23012940e3f4b9a93622.docx]

**Additional file 1: Table S1.** Sequences of the primers.

| **name** | **Sequences** | |
| --- | --- | --- |
| **for (5’-3’)** | **rev (5’-3’)** |
| IL-1β | GCAACTGTTCCTGAACTCAACT | ATCTTTTGGGGTCCGTCAACT |
| IL-6 | TAGTCCTTCCTACCCCAATTTCC | TAGTCCTTCCTACCCCAATTTCC |
| TNF-α | CCCTCACACTCAGATCATCTTCT | GCTACGACGTGGGCTACAG |
| CD16 | TTTGGACACCCAGATGTTTCAG | GTCTTCCTTGAGCACCTGGATC |
| CD32 | AATCCTGCCGTTCCTACTGATC | GTGTCACCGTGTCTTCCTT GAG |
| CD86 | TTGTGTGTGTTCTGG AAACGGAG | AACTTAGAGGCTGTG TTGCTGGG |
| Rplp0 | AGATTCGGGATATGCTGTTGGC | TCGG GTCCTAGACCAGTGTTC |
| mmu-miR-155-5p | UUAAUGCUAAUUGUGAUAGGGGU | |
